# Supplementary material
Source: HighWire-hosted journal article supplement (https://erj.ersjournals.com/content/51/4/1701197)
Supplement: inline-supplementary-material-1 [file inline-supplementary-material-1.pdf]

Supplementary table 1

Characteristics of borderline patients at baseline

|                                    | n (%) or mean (SD) |        | median | Q25%-Q75%     |
|------------------------------------|--------------------|--------|--------|---------------|
| gender                             |                    |        |        |               |
| female                             | 19                 | 79.2%  |        |               |
| Demography                         |                    |        |        |               |
| Age, years                         | 61.0               | ± 9.3  | 61.0   | 56.5 - 67.5   |
| Body height, cm                    | 160.8              | ± 7.4  | 160.3  | 155.5 - 165.5 |
| Body weight, kg                    | 66.2               | ± 13.3 | 64.9   | 57.0 - 72.4   |
| BMI                                | 25.5               | ± 4.5  | 25.2   | -             |
| Vital Signs                        |                    |        |        |               |
| Blood Pressure, systolic, mmHg     | 118                | ± 17   | 114    | 110 - 132     |
| Blood Pressure, diastolic, mmHg    | 70                 | ± 11   | 68     | 60 - 80       |
| Heart rate, /min                   | 77.8               | ± 12.9 | 77     | 72 - 80       |
| Systemic sclerosis characteristics |                    |        |        |               |
| Modified Rodnan Skin Score         | 10                 | ± 8    | 8      | 6 - 12        |
| Duration of SSc, months            | 11.2               | ± 6.5  | 9.5    | 6.5 - 15.0    |
| Type of systemic sclerosis         |                    |        |        |               |
| Diffuse cutaneous SSc              | 6                  | 25.0 % |        |               |
| Limited cutaneous SSc              | 15                 | 62.5 % |        |               |
| Mixed connective tissue disease    | 3                  | 12.5 % |        |               |
| WHO-functional class               |                    |        |        |               |
| I                                  | 1                  | 4.2 %  |        |               |
| II                                 | 4                  | 16.7 % |        |               |
| III                                | 12                 | 50.0 % |        |               |

BMI = Body Mass Index, SSc = Systemic Sclerosis

Supplementary table 2

Characteristics of borderline patients at baseline developing and not developing PH

|                                      | borderline patients not developing PH |              |    |        |               | patients developing manifest PH |              |    |        |               | p-value |
|--------------------------------------|---------------------------------------|--------------|----|--------|---------------|---------------------------------|--------------|----|--------|---------------|---------|
|                                      | n                                     | mean         | SD | median | Q25%-Q75%     | n                               | mean         | SD | median | Q25%-Q75%     |         |
| 6-MWD                                | 15                                    | 320 ± 111    |    | 375    | 231 - 393     | 7                               | 311 ± 153    |    | 364    | 198 - 472     |         |
| NTproBNP                             | 14                                    | 170 ± 457    |    | 37     | -51 - 269     | 7                               | 195 ± 387    |    | 61     | 40 - 104      |         |
| <b>pulmonary function</b>            |                                       |              |    |        |               |                                 |              |    |        |               |         |
| FVC, l                               | 17                                    | 2.23 ± 0.7   |    | 2.2    | 1.8 - 2.5     | 6                               | 3.0 ± 0.6    |    | 3.1    | 2.8 - 3.3     | *       |
| FVC, %                               | 17                                    | 84.45 ± 20.0 |    | 88.3   | 67.2 - 95.9   | 7                               | 89.8 ± 27.6  |    | 82.9   | 71.0 - 121.0  |         |
| FEV <sub>1</sub> , l                 | 17                                    | 1.6 ± 0.5    |    | 1.6    | 1.4 - 1.8     | 6                               | 2.2 ± 0.4    |    | 2.3    | 2.1 - 2.5     | *       |
| FEV <sub>1</sub> , %                 | 17                                    | 74.62 ± 13.4 |    | 77.0   | 63.0 - 84.2   | 6                               | 83.8 ± 21.0  |    | 86.1   | 71.8 - 104.3  |         |
| DL <sub>CO</sub> , mmol/min/kPa      | 17                                    | 7.1 ± 3.4    |    | 7.5    | 4.6 - 10.0    | 6                               | 10.8 ± 2.8   |    | 10.9   | 8.5 - 13.4    |         |
| DL <sub>CO</sub> , %                 | 17                                    | 43.3 ± 12.8  |    | 42.9   | 37.0 - 50.5   | 7                               | 42.9 ± 12.8  |    | 36.8   | 31.9 - 55.0   | *       |
| DL <sub>CO</sub> /VA, mmol/min/kPa/l | 17                                    | 3.0 ± 1.2    |    | 3.1    | 2.6 - 3.6     | 6                               | 2.7 ± 0.5    |    | 2.5    | 2.5 - 3.0     |         |
| DL <sub>CO</sub> /VA, %              | 17                                    | 69.3 ± 18.7  |    | 70.7   | 61.4 - 78.0   | 6                               | 61.7 ± 14.0  |    | 60.7   | 52.3 - 69.7   |         |
| TLC, %                               | 14                                    | 73.4 ± 18.5  |    | 70.6   | 58.5 - 82.0   | 6                               | 82.7 ± 28.3  |    | 83.0   | 59.1 - 101.8  |         |
| RV, %                                | 15                                    | 66.3 ± 26.6  |    | 62.6   | 52.4 - 74.5   | 6                               | 74.3 ± 35.8  |    | 72.1   | 39.3 - 96.8   |         |
| <b>Echocardiography</b>              |                                       |              |    |        |               |                                 |              |    |        |               |         |
| LA, mm                               | 16                                    | 31.7 ± 4.9   |    | 32.0   | 27.3 - 34.6   | 6                               | 33.2 ± 5.4   |    | 31.5   | 30.0 - 33.0   |         |
| IVC, mm                              | 12                                    | 14.9 ± 4.2   |    | 15.6   | 12.3 - 18.7   | 5                               | 13.4 ± 3.3   |    | 13.0   | 12.1 - 13.1   |         |
| IVS, mm                              | 16                                    | 10.2 ± 1.6   |    | 10.6   | 9.8 - 11.1    | 6                               | 9.3 ± 2.4    |    | 9.0    | 8.0 - 10.7    |         |
| RA, cm <sup>2</sup>                  | 15                                    | 12.1 ± 4.3   |    | 11.6   | 9.0 - 14.3    | 6                               | 15.6 ± 4.8   |    | 16.8   | 11.3 - 19.4   |         |
| RVD, mm                              | 14                                    | 26.2 ± 3.7   |    | 26.2   | 22.6 - 30.0   | 6                               | 26.8 ± 5.5   |    | 27.5   | 21.0 - 32.0   |         |
| RV, cm <sup>2</sup>                  | 14                                    | 13.3 ± 4.9   |    | 12.5   | 10.6 - 15.3   | 6                               | 19.6 ± 2.7   |    | 19.0   | 18.5 - 21.0   | *       |
| LV-EDD, mm                           | 16                                    | 44.5 ± 4.3   |    | 44.8   | 42.5 - 46.9   | 6                               | 50.0 ± 4.8   |    | 51.0   | 46.0 - 54.1   | *       |
| LV-ESD, mm                           | 16                                    | 27.0 ± 4.1   |    | 26.0   | 25.0 - 29.5   | 6                               | 31.3 ± 6.4   |    | 30.3   | 29.0 - 35.0   |         |
| TRV, m/s                             | 17                                    | 2.7 ± 0.3    |    | 2.7    | 2.5 - 2.8     | 6                               | 2.6 ± 0.4    |    | 2.6    | 2.5 - 2.7     |         |
| TAPSE, mm                            | 15                                    | 20.4 ± 5.6   |    | 19.1   | 15.5 - 24.0   | 6                               | 24.7 ± 7.8   |    | 22.5   | 22.0 - 28.2   |         |
| sPAP, mmHg                           | 17                                    | 33.5 ± 5.5   |    | 33.7   | 30.0 - 36.4   | 6                               | 33.1 ± 8.7   |    | 32.4   | 29.2 - 34.2   |         |
| <b>right heart catheterisation</b>   |                                       |              |    |        |               |                                 |              |    |        |               |         |
| mPAP, mmHg                           | 17                                    | 22.0 ± 0.9   |    | 22.0   | 21.0 - 23.0   | 7                               | 22.6 ± 1.1   |    | 22.0   | 22.0 - 24.0   |         |
| PAWP, mmHg                           | 17                                    | 10.9 ± 2.4   |    | 11.0   | 10.0 - 12.0   | 7                               | 11.6 ± 3.4   |    | 12.0   | 8.0 - 15.0    |         |
| TPG, mmHg                            | 17                                    | 10.8 ± 2.3   |    | 12.0   | 9.0 - 12.0    | 7                               | 11.0 ± 3.4   |    | 11.0   | 9.0 - 14.0    |         |
| CO, l/min                            | 17                                    | 4.9 ± 1.3    |    | 4.4    | 3.9 - 5.9     | 7                               | 4.8 ± 0.6    |    | 4.9    | 4.4 - 5.2     |         |
| PVR, dynes                           | 17                                    | 190.2 ± 64.9 |    | 181.0  | 140.0 - 223.3 | 7                               | 183.9 ± 64.3 |    | 169.2  | 146.9 - 231.0 |         |
| RAP, mmHg                            | 17                                    | 4.8 ± 2.4    |    | 4.0    | 3.0 - 3.46    | 7                               | 5.6 ± 2.8    |    | 5.0    | 4.0 - 7.0     |         |

PH = pulmonary hypertension, Q25% - Q75% = 25% and 75% quantiles, 6-MWD = 6-minute walking distance, NTproBNP = N-terminal pro Brain Natriuretic Peptide, FVC = forced vital capacity, FEV1 = forced expiratory volume in one second, DLCO = diffusion capacity of the lung for carbon monoxide, VA = alveolar volume, TLC = total lung capacity, RV = residual volume, LA = left atrium, IVC = inferior vena cava, IVS = interventricular septum, RA = right atrium, RVD = right ventricular diameter, RV = right ventricle, LV = left ventricle, EDD = end-diastolic diameter, ESD = end-systolic diameter, TRV = tricuspid regurgitation velocity, TAPSE = tricuspid annular plane systolic excursion, sPAP = systolic pulmonary arterial hypertension, mPAP = mean pulmonary arterial pressure, PAWP = pulmonary arterial wedge pressure, TPG = transpulmonary gradient, CO = cardiac output, PVR = pulmonary vascular resistance.

**Supplementary table 3**

**baseline characteristics, all patients - extended description**

|                                      | <b>n</b> | <b>mean</b>  | <b>SD</b> | <b>median</b> | <b>Q25%-Q75%</b> |
|--------------------------------------|----------|--------------|-----------|---------------|------------------|
| 6-MWD                                | 91       | 403 ± 111    |           | 419           | 335 - 477        |
| NT-proBNP, pg/ml                     | 95       | 216 ± 266    |           | 124           | 67 - 256         |
| <b>pulmonary function testing</b>    |          |              |           |               |                  |
| FVC, l                               | 94       | 2.85 ± 1.0   |           | 2.7           | 2.08 - 3.54      |
| FVC, %                               | 96       | 91.2 ± 23.7  |           | 90.9          | 73.2 - 110       |
| FEV <sub>1</sub> , l                 | 94       | 2.2 ± 0.8    |           | 2.1           | 1.52 - 2.81      |
| FEV <sub>1</sub> , %                 | 95       | 85.7 ± 22.9  |           | 84.2          | 68.3 - 101       |
| DL <sub>CO</sub> , mmol/min/kPa      | 93       | 7.5 ± 4.0    |           | 5.5           | 4.57 - 10.31     |
| DL <sub>CO</sub> , %                 | 95       | 48.9 ± 10.8  |           | 51.1          | 41.3 - 57.1      |
| DL <sub>CO</sub> /VA, mmol/min/kPa/l | 93       | 2.5 ± 1.5    |           | 2.54          | 1.11 - 3.4       |
| DL <sub>CO</sub> /VA, %              | 93       | 71.4 ± 16.9  |           | 69.7          | 60.2 - 82.9      |
| TLC, %                               | 83       | 85.8 ± 22.3  |           | 87.2          | 68.0 - 101.8     |
| RV, %                                | 84       | 85.8 ± 33.1  |           | 82.5          | 62.8 - 106.4     |
| <b>echocardiography</b>              |          |              |           |               |                  |
| LA, mm                               | 93       | 29.1 ± 6.4   |           | 29            | 25.5 - 32.0      |
| IVC, mm                              | 82       | 14.0 ± 3.7   |           | 14            | 11.8 - 16.0      |
| IVS, mm                              | 92       | 10.1 ± 1.8   |           | 10            | 9.0 - 11.0       |
| RA, cm <sup>2</sup>                  | 89       | 12.1 ± 3.7   |           | 11.8          | 9.3 - 14.0       |
| RVD, mm                              | 85       | 29.1 ± 5.6   |           | 30            | 26.0 - 33.0      |
| RV, cm <sup>2</sup>                  | 88       | 14.5 ± 4.3   |           | 14.7          | 11.7 - 17.0      |
| LV-EDD, mm                           | 92       | 44.1 ± 5.5   |           | 44            | 40.5 - 47.0      |
| LV-ESD, mm                           | 91       | 27.0 ± 5.1   |           | 26            | 23.5 - 30.0      |
| TRV, m/s                             | 88       | 2.4 ± 0.4    |           | 2.41          | 2.2 - 2.6        |
| TAPSE, mm                            | 89       | 22.5 ± 4.6   |           | 22            | 19.8 - 25.0      |
| sPAP, mmHg                           | 87       | 29.1 ± 7.1   |           | 28.4          | 24.4 - 33.1      |
| <b>right heart catheterisation</b>   |          |              |           |               |                  |
| mPAP, mmHg                           | 96       | 17.1 ± 4.0   |           | 17            | 15.0 - 20.5      |
| PAWP, mmHg                           | 96       | 8.5 ± 3.3    |           | 9             | 6.0 - 11.0       |
| TPG, mmHg                            | 96       | 8.5 ± 2.9    |           | 8             | 6.0 - 11.0       |
| CO, l/min                            | 96       | 5.3 ± 1.2    |           | 5.2           | 4.4 - 6.2        |
| PVR, dynes                           | 96       | 135.2 ± 55.4 |           | 124.2         | 100.1 - 163.0    |
| RAP, mmHg                            | 96       | 4.1 ± 2.4    |           | 4             | 2.0 - 5.0        |

PH = pulmonary hypertension, Q25% - Q75% = 25% and 75% quantiles, 6-MWD = 6-minute walking distance, NTproBNP = N-terminal pro Brain Natriuretic Peptide, FVC = forced vital capacity, FEV1 = forced expiratory volume in one second, DLCO = diffusion capacity of the lung for carbon monoxide, VA = alveolar volume, TLC = total lung capacity, RV = residual volume, LA = left atrium, IVC = inferior vena cava, IVS = interventricular septum, RA = right atrium, RVD = right ventricular diameter, RV = right ventricle, LV = left ventricle, EDD = end-diastolic diameter, ESD = end-systolic diameter, TRV = tricuspid regurgitation velocity, TAPSE = tricuspid annular plane systolic excursion, sPAP = systolic pulmonary arterial hypertension, mPAP = mean pulmonary arterial pressure, PAWP = pulmonary arterial wedge pressure, TPG = transpulmonary gradient, CO = cardiac output, PVR = pulmonary vascular resistance.

**Supplementary table 4**

**Additional baseline characteristics of PH Groups**

|                                      | PH left heart disease |       |        |        |           |         | PH lung disease |       |        |        |           |         |
|--------------------------------------|-----------------------|-------|--------|--------|-----------|---------|-----------------|-------|--------|--------|-----------|---------|
|                                      | n                     | mean  | SD     | median | Q25%-Q75% |         | n               | mean  | SD     | median | Q25%-Q75% |         |
| 6-MWD                                | 7                     | 416   | ± 188  | 445    | 394       | - 560   | 10              | 392   | ± 101  | 376    | 330       | - 477   |
| NT-proBNP, pg/ml                     | 7                     | 382   | ± 111  | 256    | 92        | - 310   | 10              | 115   | ± 87   | 107    | 34        | - 160   |
| <b>pulmonary function testing</b>    |                       |       |        |        |           |         |                 |       |        |        |           |         |
| FVC, l                               | 7                     | 2.9   | ± 0.9  | 3.1    | 2.6       | - 3.7   | 9               | 2.7   | ± 1.2  | 2.0    | 1.9       | - 3.9   |
| FVC, %                               | 7                     | 94.3  | ± 33.3 | 102.0  | 77.2      | - 113.2 | 10              | 77.1  | ± 27.3 | 69.5   | 55.8      | - 90.8  |
| FEV <sub>1</sub> , l                 | 7                     | 2.3   | ± 0.7  | 2.6    | 1.9       | - 2.8   | 9               | 2.4   | ± 1.2  | 1.9    | 1.6       | - 3.8   |
| FEV <sub>1</sub> , %                 | 7                     | 87.2  | ± 25.5 | 92.2   | 85.3      | - 100.9 | 9               | 77.3  | ± 31.0 | 60.6   | 59.0      | - 80.8  |
| DL <sub>co</sub> , mmol/min/kPa      | 7                     | 8.2   | ± 4.1  | 4.8    | 4.7       | - 12.7  | 9               | 6.0   | ± 2.3  | 5.5    | 4.9       | - 7.5   |
| DL <sub>co</sub> , %                 | 7                     | 55.3  | ± 2.1  | 55.1   | 54.5      | - 56.5  | 10              | 38.6  | ± 12.5 | 34.0   | 27.3      | - 48.1  |
| DL <sub>co</sub> /VA, mmol/min/kPa/l | 7                     | 1.9   | ± 0.8  | 1.4    | 1.1       | - 3.0   | 9               | 2.6   | ± 2.3  | 2.5    | 1.0       | - 2.5   |
| DL <sub>co</sub> /VA, %              | 7                     | 69.0  | 14.7   | 65.1   | 57.8      | 85.3    | 9               | 60.6  | 16.4   | 58.7   | 52.8      | 61.7    |
| TLC, %                               | 6                     | 96.5  | ± 30.9 | 96.5   | 83.0      | - 123.1 | 8               | 66.8  | ± 27.7 | 57.7   | 49.9      | - 76.3  |
| RV, %                                | 6                     | 11.4  | ± 33.3 | 116.6  | 78.9      | - 137.5 | 8               | 57.9  | ± 33.2 | 52.3   | 37.3      | - 78.9  |
| <b>echocardiography</b>              |                       |       |        |        |           |         |                 |       |        |        |           |         |
| LA, mm                               | 7                     | 28.9  | ± 6.9  | 30.0   | 20.0      | - 32.0  | 9               | 26.8  | ± 8.4  | 27.0   | 22.0      | - 30.0  |
| IVC, mm                              | 7                     | 13.0  | ± 3.5  | 12.0   | 11.0      | - 15.3  | 8               | 15.0  | ± 3.7  | 15.6   | 11.6      | - 18.5  |
| IVS, mm                              | 7                     | 10.4  | ± 0.7  | 9.0    | 8.5       | - 10.0  | 9               | 10.1  | ± 1.8  | 10.0   | 9.0       | - 11.0  |
| RA, cm <sup>2</sup>                  | 7                     | 11.9  | ± 3.4  | 11.6   | 8.8       | - 13.0  | 9               | 12.6  | ± 4.8  | 12.0   | 9.8       | - 16.0  |
| RVD, mm                              | 5                     | 31.6  | ± 3.2  | 35.0   | 29.0      | - 35.0  | 9               | 28.7  | ± 4.8  | 28.0   | 26.0      | - 33.0  |
| RV, cm <sup>2</sup>                  | 7                     | 13.7  | ± 5.7  | 15.0   | 12.2      | - 16.0  | 9               | 14.4  | ± 4.9  | 14.9   | 11.5      | - 18.0  |
| LV-EDD, mm                           | 7                     | 43.8  | ± 5.9  | 46.0   | 37.0      | - 49.0  | 9               | 41.4  | ± 6.7  | 42.6   | 39.0      | - 43.0  |
| LV-ESD, mm                           | 7                     | 28.3  | ± 2.7  | 29.0   | 25.0      | - 31.0  | 8               | 27.3  | ± 6.3  | 25.6   | 23.5      | - 29.0  |
| TRV, m/s                             | 6                     | 2.5   | ± 0.1  | 2.5    | 2.3       | - 2.6   | 9               | 2.4   | ± 0.4  | 2.3    | 2.2       | - 2.6   |
| TAPSE, mm                            | 7                     | 22.6  | ± 5.7  | 23.0   | 17.0      | - 27.0  | 9               | 21.2  | ± 4.2  | 22.0   | 19.0      | - 22.0  |
| sPAP, mmHg                           | 6                     | 30.3  | ± 2.5  | 29.8   | 26.2      | - 31.6  | 9               | 28.2  | ± 7.1  | 26.5   | 24.4      | - 32.7  |
| <b>right heart catheterisation</b>   |                       |       |        |        |           |         |                 |       |        |        |           |         |
| mPAP, mmHg                           | 7                     | 17.0  | ± 4.5  | 20.0   | 13.0      | - 20.0  | 10              | 18.5  | ± 3.3  | 18.5   | 16.0      | - 22.0  |
| PAWP, mmHg                           | 7                     | 8.9   | ± 5.1  | 8.0    | 6.0       | - 12.0  | 10              | 8.9   | ± 1.9  | 9.0    | 7.0       | - 10.0  |
| TPG, mmHg                            | 7                     | 7.3   | ± 1.3  | 8.0    | 6.0       | - 8.0   | 10              | 10.7  | ± 3.6  | 11.0   | 10.0      | - 13.0  |
| CO, l/min                            | 7                     | 5.1   | ± 0.8  | 5.0    | 4.4       | - 5.6   | 10              | 5.0   | ± 1.0  | 5.0    | 4.1       | - 5.9   |
| PVR, dynes                           | 7                     | 128.4 | ± 29.5 | 111.0  | 105.7     | - 167.4 | 10              | 161.3 | ± 74.8 | 153.0  | 123.1     | - 231.0 |
| RAP, mmHg                            | 7                     | 4.7   | ± 3.6  | 5.0    | 3.0       | - 6.0   | 10              | 4.6   | ± 2.2  | 4.5    | 4.1       | - 5.0   |

PH left heart disease = pulmonary hypertension secondary to left heart disease, PH lung disease = pulmonary hypertension secondary to lung disease, Q25% - Q75% = 25% and 75% quantiles, 6-MWD = 6-minute walking distance, NTproBNP = N-terminal pro Brain Natriuretic Peptide, FVC = forced vital capacity, FEV1 = forced expiratory volume in one second, DLCO = diffusion capacity of the lung for carbon monoxide, VA = alveolar volume, TLC = total lung capacity, RV = residual volume, LA = left atrium, IVC = inferior vena cava, IVS = interventricular septum, RA = right atrium, RVD = right ventricular diameter, RV = right ventricle, LV = left ventricle, EDD = end-diastolic diameter, ESD = end-systolic diameter, TRV = tricuspid regurgitation velocity, TAPSE = tricuspid annular plane systolic excursion, sPAP = systolic pulmonary arterial hypertension, mPAP = mean pulmonary arterial pressure, PAWP = pulmonary arterial wedge pressure, TPG = transpulmonary gradient, CO = cardiac output, PVR = pulmonary vascular resistance.

Supplementary table 5

Baseline characteristic of patients according to follow-up (patients who did perform RHC vs. patients who only performed noninvasive follow-up)

|                                      | noninvasive follow-up |       |        |        |           |         |    | right heart catheterisation |        |        |           |         |   |  | p-value |
|--------------------------------------|-----------------------|-------|--------|--------|-----------|---------|----|-----------------------------|--------|--------|-----------|---------|---|--|---------|
|                                      | n                     | mean  | SD     | median | Q25%-Q75% |         | n  | mean                        | SD     | median | Q25%-Q75% |         |   |  |         |
| 6-MWD                                | 13                    | 456   | ± 108  | 480    | 420       | - 537   | 66 | 384                         | ± 110  | 397    | 334       | - 451   | * |  |         |
| NT-proBNP, pg/ml                     | 13                    | 205   | ± 340  | 92     | 60        | - 193   | 69 | 216                         | ± 249  | 128    | 68        | - 256   |   |  |         |
| pulmonary function testing           |                       |       |        |        |           |         |    |                             |        |        |           |         |   |  |         |
| FVC, l                               | 13                    | 2.9   | ± 1.2  | 2.9    | 2.1       | - 4.0   | 69 | 2.8                         | ± 0.9  | 2.5    | 2.0       | - 3.3   |   |  |         |
| FVC, %                               | 13                    | 88.5  | ± 20.5 | 84.0   | 73.0      | - 103.7 | 71 | 90.2                        | ± 23.5 | 90.0   | 71.0      | - 110.0 |   |  |         |
| FEV <sub>1</sub> , l                 | 13                    | 2.4   | ± 1.0  | 2.6    | 1.4       | - 3.0   | 69 | 2.1                         | ± 0.8  | 2.0    | 1.5       | - 2.6   |   |  |         |
| FEV <sub>1</sub> , %                 | 13                    | 89.0  | ± 21.5 | 85.3   | 70.6      | - 109.5 | 70 | 83.0                        | ± 22.6 | 83.7   | 64.6      | - 99.8  |   |  |         |
| DL <sub>CO</sub> , mmol/min/kPa      | 13                    | 4.2   | ± 1.6  | 4.4    | 3.5       | - 4.8   | 69 | 8.1                         | ± 3.9  | 7.5    | 4.7       | - 11.0  | * |  |         |
| DL <sub>CO</sub> , %                 | 13                    | 45.8  | ± 13.1 | 47.4   | 41.8      | - 55.2  | 71 | 48.7                        | ± 10.8 | 50.6   | 40.1      | - 57.1  |   |  |         |
| DL <sub>CO</sub> /VA, mmol/min/kPa/l | 13                    | 1.4   | ± 0.9  | 1.1    | 0.9       | - 1.4   | 69 | 2.8                         | ± 1.5  | 2.9    | 1.5       | - 3.6   | * |  |         |
| DL <sub>CO</sub> /VA, %              | 13                    | 70.1  | ± 18.8 | 67.5   | 61.0      | - 82.9  | 69 | 71.4                        | ± 17.3 | 70.7   | 59.0      | - 83.0  |   |  |         |
| TLC, %                               | 11                    | 87.1  | ± 17.6 | 93.0   | 75.7      | - 100.0 | 61 | 83.0                        | ± 21.4 | 83.0   | 67.9      | - 97.0  |   |  |         |
| RV, %                                | 11                    | 96.9  | ± 30.9 | 102.9  | 64.0      | - 125.0 | 62 | 81.2                        | ± 32.5 | 79.2   | 62.1      | - 102.0 |   |  |         |
| echocardiography                     |                       |       |        |        |           |         |    |                             |        |        |           |         |   |  |         |
| LA, mm                               | 13                    | 25.0  | ± 6.1  | 25.0   | 22.0      | - 29.0  | 68 | 30.3                        | ± 6.1  | 30.0   | 26.0      | - 33.0  | * |  |         |
| IVC, mm                              | 12                    | 12.3  | ± 4.5  | 12.3   | 9.5       | - 14.0  | 58 | 14.1                        | ± 3.4  | 14.0   | 12.0      | - 16.0  |   |  |         |
| IVS, mm                              | 13                    | 10.5  | ± 1.5  | 10.6   | 9.0       | - 11.0  | 67 | 10.0                        | ± 1.9  | 10.0   | 9.0       | - 11.0  |   |  |         |
| RA, cm <sup>2</sup>                  | 13                    | 9.9   | ± 2.4  | 9.5    | 8.4       | - 11.2  | 64 | 12.7                        | ± 4.0  | 12.0   | 10.0      | - 15.5  | * |  |         |
| RVD, mm                              | 11                    | 30.8  | ± 4.2  | 31.0   | 29.0      | - 33.0  | 62 | 28.5                        | ± 6.0  | 29.5   | 25.0      | - 33.3  |   |  |         |
| RV, cm <sup>2</sup>                  | 13                    | 14.1  | ± 3.4  | 14.0   | 13.3      | - 15.0  | 63 | 14.8                        | ± 4.4  | 15.0   | 11.7      | - 18.5  |   |  |         |
| LV-EDD, mm                           | 13                    | 44.3  | ± 6.0  | 44.0   | 39.0      | - 49.0  | 67 | 44.2                        | ± 5.4  | 44.0   | 41.2      | - 47.0  |   |  |         |
| LV-ESD, mm                           | 13                    | 27.8  | ± 5.3  | 26.0   | 25.0      | - 31.0  | 66 | 26.8                        | ± 5.1  | 26.0   | 23.0      | - 30.0  |   |  |         |
| TRV, m/s                             | 12                    | 2.5   | ± 0.4  | 2.5    | 2.4       | - 2.6   | 66 | 2.5                         | ± 0.4  | 2.5    | 2.3       | - 2.7   |   |  |         |
| TAPSE, mm                            | 13                    | 22.8  | ± 4.5  | 23.0   | 20.0      | - 26.0  | 64 | 22.5                        | ± 5.0  | 22.0   | 19.0      | - 26.0  |   |  |         |
| sPAP, mmHg                           | 12                    | 29.6  | ± 6.9  | 29.0   | 27.3      | - 32.8  | 65 | 29.7                        | ± 7.4  | 30.0   | 25.3      | - 33.7  |   |  |         |
| right heart catheterisation          |                       |       |        |        |           |         |    |                             |        |        |           |         |   |  |         |
| mPAP, mmHg                           | 13                    | 16.4  | ± 4.1  | 16.0   | 14.0      | - 19.0  | 71 | 17.7                        | ± 3.7  | 18.0   | 15.0      | - 21.0  |   |  |         |
| PAWP, mmHg                           | 13                    | 6.9   | ± 2.8  | 7.0    | 5.0       | - 8.0   | 71 | 9.0                         | ± 3.0  | 9.0    | 7.0       | - 11.0  | * |  |         |
| TPG, mmHg                            | 13                    | 9.4   | ± 3.5  | 8.0    | 7.0       | - 12.0  | 71 | 8.6                         | ± 2.9  | 8.0    | 6.0       | - 11.0  |   |  |         |
| CO, l/min                            | 13                    | 5.3   | ± 1.3  | 5.3    | 4.4       | - 6.2   | 71 | 5.3                         | ± 1.2  | 5.2    | 4.4       | - 6.1   |   |  |         |
| PVR, dynes                           | 13                    | 148.4 | ± 73.1 | 12.7   | 103.2     | - 171.4 | 71 | 138.2                       | ± 52.9 | 126.0  | 104.9     | - 163.3 |   |  |         |
| RAP, mmHg                            | 13                    | 3.5   | ± 2.0  | 4.0    | 2.0       | - 5.0   | 71 | 4.2                         | ± 2.3  | 4.0    | 3.0       | - 5.0   |   |  |         |

Q25% - Q75% = 25% and 75% quantiles, 6-MWD = 6-minute walking distance, NTproBNP = N-terminal pro Brain Natriuretic Peptide, FVC = forced vital capacity, FEV1 = forced expiratory volume in one second, DLCO = diffusion capacity of the lung for carbon monoxide, VA = alveolar volume, TLC = total lung capacity, RV = residual volume, LA = left atrium, IVC = inferior vena cava, IVS = interventricular septum, RA = right atrium, RVD = right ventricular diameter, RV = right ventricle, LV = left ventricle, EDD = end-diastolic diameter, ESD = end-systolic diameter, TRV = tricuspid regurgitation velocity, TAPSE = tricuspid annular plane systolic excursion, sPAP = systolic pulmonary arterial hypertension, mPAP = mean pulmonary arterial pressure, PAWP = pulmonary arterial wedge pressure, TPG = transpulmonary gradient, CO = cardiac output, PVR = pulmonary vascular resistance. \* denotes a significant difference between groups.

Supplementary table 6  
Additional follow-up characteristics of PH Groups

|  | normal |      |    |        |           | PH  |      |    |        |           |                       |      |    |        |           |                 |      |    |        |           |
|--|--------|------|----|--------|-----------|-----|------|----|--------|-----------|-----------------------|------|----|--------|-----------|-----------------|------|----|--------|-----------|
|  |        |      |    |        |           | PAH |      |    |        |           | PH left heart disease |      |    |        |           | PH lung disease |      |    |        |           |
|  | n      | mean | SD | median | Q25%-Q75% | n   | mean | SD | median | Q25%-Q75% | n                     | mean | SD | median | Q25%-Q75% | n               | mean | SD | median | Q25%-Q75% |

|                                      |    |              |  |       |              |   |              |  |       |              |   |              |  |       |              |   |               |  |       |              |
|--------------------------------------|----|--------------|--|-------|--------------|---|--------------|--|-------|--------------|---|--------------|--|-------|--------------|---|---------------|--|-------|--------------|
| 6-MWD                                | 47 | 399 ± 121    |  | 400   | 327 - 472    | 4 | 325 ± 133    |  | 292   | 225 - 425    | 7 | 376 ± 159    |  | 390   | 340 - 434    | 8 | 366 ± 122     |  | 330   | 261 - 461    |
| NT-proBNP, pg/ml                     | 57 | 276 ± 377    |  | 132   | 74 - 237     | 5 | 418 ± 538    |  | 237   | 107 - 328    | 6 | 466 ± 717    |  | 177   | 114 - 328    | 9 | 1142 ± 2963   |  | 123   | 107 - 262    |
| pulmonary function testing           |    |              |  |       |              |   |              |  |       |              |   |              |  |       |              |   |               |  |       |              |
| FVC, l                               | 58 | 2.6 ± 0.9    |  | 2.6   | 1.9 - 3.34   | 3 | 3.0 ± 0.3    |  | 2.9   | 2.8 - 3.3    | 6 | 3.3 ± 0.6    |  | 3.3   | 2.9 - 3.7    | 8 | 2.4 ± 1.6     |  | 1.7   | 1.2 - 4.1    |
| FVC, %                               | 57 | 88.9 ± 22    |  | 92.1  | 68.2 - 108.2 | 4 | 105.4 ± 27.7 |  | 115.4 | 87.3 - 123.4 | 6 | 106.2 ± 16.7 |  | 111.8 | 99 - 118.7   | 9 | 73 ± 34       |  | 56.4  | 53.5 - 106.6 |
| FEV <sub>1</sub> , l                 | 57 | 2.01 ± 0.8   |  | 2.0   | 1.4 - 2.5    | 3 | 2.0 ± 0.1    |  | 2.0   | 1.9 - 2.1    | 6 | 2.5 ± 0.5    |  | 2.6   | 2.2 - 3.0    | 8 | 2.0 ± 1.2     |  | 1.5   | 1.0 - 3.3    |
| FEV <sub>1</sub> , %                 | 57 | 81.8 ± 20,5  |  | 80.1  | 64.9 - 95.9  | 3 | 95.2 ± 10.9  |  | 90.5  | 87.4 - 107.7 | 6 | 96.2 ± 12.3  |  | 95.2  | 84.1 - 109.4 | 9 | 74.2 ± 31.7   |  | 67.8  | 53.8 - 96.5  |
| DL <sub>co</sub> , mmol/min/kPa      | 55 | 2.9 ± 1.6    |  | 3.9   | 3.0 - 4.77   | 3 | 3.0 ± 0.4    |  | 3.2   | 2.6 - 3.3    | 5 | 4.4 ± 0.5    |  | 4.5   | 4.5 - 4.6    | 5 | 3.1 ± 1.3     |  | 3.5   | 2.2 - 3.6    |
| DL <sub>co</sub> , %                 | 55 | 47.4 ± 11.2  |  | 50.4  | 41.3 - 55.7  | 4 | 38.8 ± 8.2   |  | 38.8  | 31.9 - 45.7  | 5 | 54.6 ± 8.9   |  | 54    | 48.1 - 62    | 6 | 34.8 ± 13.1   |  | 31    | 24.3 - 49.6  |
| DL <sub>co</sub> /VA, mmol/min/kPa/l | 55 | 1.38 ± 0.9   |  | 1.05  | 0.9 - 1.4    | 3 | 0.7 ± 0.1    |  | 0.7   | 0.6 - 0.8    | 5 | 2.5 ± 1.9    |  | 1.5   | 1.1 - 3.6    | 6 | 1.7 ± 2.2     |  | 0.8   | 0.6 - 1.6    |
| DL <sub>co</sub> /VA, %              | 55 | 69.0 ± 15.6  |  | 68.1  | 60.3 - 82.8  | 3 | 48.8 ± 6.8   |  | 52.7  | 41 - 52.7    | 5 | 79.1 ± 18.5  |  | 75    | 71.2 - 93.1  | 6 | 56.2 ± 22.6   |  | 50.8  | 45.7 - 78    |
| TLC, %                               | 55 | 88.7 ± 21.9  |  | 89    | 68.1 - 106.2 | 3 | 101.3 ± 6.4  |  | 102.1 | 94.5 - 107.2 | 6 | 101.8 ± 19.1 |  | 104.1 | 85.1 - 111.9 | 6 | 81.1 ± 36     |  | 72.9  | 54 - 122.4   |
| RV, %                                | 49 | 95.16 ± 34.6 |  | 97.9  | 79 - 113     | 3 | 93.8 ± 7.9   |  | 89.9  | 88.6 - 102.9 | 5 | 100.5 ± 35.4 |  | 94.8  | 89.1 - 105.3 | 6 | 38.9 ± 42.5   |  | 65.2  | 54.1 - 107.9 |
| echocardiography                     |    |              |  |       |              |   |              |  |       |              |   |              |  |       |              |   |               |  |       |              |
| LA, mm                               | 55 | 30.4 ± 6.5   |  | 30    | 28 - 34      | 4 | 29.2 ± 1.9   |  | 29    | 28 - 30.4    | 7 | 31.6 ± 8.1   |  | 32    | 8.5 - 35     | 6 | 26.8 ± 7.3    |  | 26.5  | 22 - 32      |
| IVC, mm                              | 50 | 12.2 ± 5.9   |  | 14    | 8.6 - 16     | 2 | 18.5 ± 5.0   |  | 18.5  | 15 - 22      | 5 | 11.1 ± 8.0   |  | 10    | 8,5 - 13     | 7 | 13.9 ± 2.8    |  | 14    | 11 - 16      |
| IVS, mm                              | 30 | 10.7 ± 2.0   |  | 10.4  | 9 - 12       | 3 | 8.7 ± 1.6    |  | 9.2   | 7 - 10       | 2 | 10.1 ± 0.1   |  | 10.1  | 10 - 10.2    | 5 | 7.5 ± 3.8     |  | 8     | 8 - 9.3      |
| RA, cm <sup>2</sup>                  | 54 | 12.6 ± 4.1   |  | 12    | 10.6 - 13.8  | 4 | 15.8 ± 6.5   |  | 13.8  | 11.5 - 20    | 6 | 12.5 ± 3.0   |  | 12.8  | 10 - 14      | 8 | 11.7 ± 3.3    |  | 12.4  | 9.2 - 14.5   |
| RVD, mm                              | 30 | 31 ± 7       |  | 30    | 27 - 36      | 4 | 36 ± 8       |  | 34    | 30 - 41      | 3 | 33 ± 3       |  | 33    | 30 - 36      | 5 | 28 ± 4        |  | 26    | 26 - 30      |
| RV, cm <sup>2</sup>                  | 53 | 13.24 ± 3.63 |  | 13.5  | 10.3 - 15.5  | 4 | 15.9 ± 7.1   |  | 15.5  | 9.8 - 22     | 6 | 12.9 ± 2.0   |  | 13.0  | 11.3 - 15    | 9 | 12.3 ± 2.7    |  | 12.5  | 10.3 - 15    |
| LV-EDD, mm                           | 31 | 42.3 ± 5.7   |  | 43    | 39 - 46      | 4 | 47.2 ± 5.4   |  | 46    | 42.9 - 51.5  | 2 | 45.7 ± 0.4   |  | 45.7  | 45.4 - 46    | 5 | 35.5 ± 19.0   |  | 40    | 34 - 44      |
| LV-ESD, mm                           | 31 | 26.4 ± 5.5   |  | 27    | 21.8 - 31    | 4 | 29.6 ± 2.1   |  | 29.8  | 28.3 - 31    | 2 | 31.2 ± 1.2   |  | 31.2  | 30.3 - 32    | 5 | 23.5 ± 14.8   |  | 24    | 21 - 24      |
| TRV, m/s                             | 47 | 2.5 ± 0.4    |  | 2.5   | 2.3 - 2.8    | 3 | 2.9 ± 0.6    |  | 2.8   | 2.4 - 3.6    | 6 | 2.4 ± 0.4    |  | 2.4   | 2.1 - 2.6    | 7 | 2.9 ± 0.4     |  | 2.8   | 2.5 - 3.2    |
| TAPSE, mm                            | 56 | 22.1 ± 4.2   |  | 22    | 19 - 25      | 5 | 22 ± 3.5     |  | 24    | 22 - 24      | 7 | 22.3 ± 8,2   |  | 22    | 19 - 27      | 9 | 21.8 ± 6.9    |  | 20    | 18 - 26      |
| sPAP, mmHg                           | 47 | 31.4 ± 8.4   |  | 30    | 25.8 - 35.7  | 3 | 40.3 ± 14.9  |  | 35.9  | 28.0 - 56.8  | 6 | 28.8 ± 7.0   |  | 27.5  | 22.8 - 31.6  | 7 | 38.7 ± 9.7    |  | 36.8  | 29.6 - 47.0  |
| right heart catheterisation          |    |              |  |       |              |   |              |  |       |              |   |              |  |       |              |   |               |  |       |              |
| mPAP, mmHg                           | 52 | 19 ± 3.7     |  | 19    | 16 - 22      | 5 | 30.6 ± 3.2   |  | 31    | 28 - 32      | 5 | 27.8 ± 2     |  | 27    | 26 - 30      | 9 | 27.7 ± 6.6    |  | 27    | 26 - 32      |
| PAWP, mmHg                           | 52 | 10.5 ± 3     |  | 11    | 8,5 - 13     | 5 | 11 ± 3       |  | 12    | 11 - 12      | 5 | 17.6 ± 3.3   |  | 16    | 16 - 20      | 9 | 9.1 ± 2.3     |  | 9     | 8 - 11       |
| TPG, mmHg                            | 52 | 8.4 ± 2.6    |  | 8     | 6,5 - 11     | 5 | 10.4 ± 2.3   |  | 10    | 9 - 11       | 5 | 7.6 ± 1.7    |  | 8     | 7 - 9        | 9 | 10.2 ± 3.1    |  | 11    | 10 - 11      |
| CO, l/min                            | 52 | 5.2 ± 1.2    |  | 5     | 4.2 - 5.9    | 5 | 5.4 ± 0.7    |  | 5,3   | 5 - 5,4      | 5 | 5.4 ± 1.3    |  | 6     | 5.4 - 6.1    | 9 | 4.7 ± 0.8     |  | 4.6   | 4.3 - 4.7    |
| PVR, dynes                           | 52 | 144.3 ± 79.0 |  | 147.2 | 98.3 - 180.5 | 5 | 300.3 ± 81.5 |  | 281   | 250 - 345    | 5 | 167.6 ± 85.6 |  | 132.7 | 131 - 163    | 9 | 340.1 ± 171.1 |  | 330.4 | 238 - 483    |
| RAP, mmHg                            | 50 | 5 ± 3        |  | 5     | 3 - 6        | 5 | 6 ± 1        |  | 7     | 5 - 7        | 5 | 10 ± 3       |  | 9     | 8 - 10       | 9 | 5 ± 2         |  | 4     | 4 - 6        |

PAH = pulmonary arterial hypertension, PH left heart disease = pulmonary hypertension secondary to left heart disease, PH lung disease = pulmonary hypertension secondary to lung disease, Q25% - Q75% = 25% and 75% quantiles, 6-MWD = 6-minute walking distance, NTproBNP = N-terminal pro Brain Natriuretic Peptide, FVC = forced vital capacity, FEV1 = forced expiratory volume in one second, DLCO = diffusion capacity of the lung for carbon monoxide, VA = alveolar volume, TLC = total lung capacity, RV = residual volume, LA = left atrium, IVC = inferior vena cava, IVS = interventricular septum, RA = right atrium, RVD = right ventricular diameter, RV = right ventricle, LV = left ventricle, EDD = end-diastolic diameter, ESD = end-systolic diameter, TRV = tricuspid regurgitation velocity, TAPSE = tricuspid annular plane systolic excursion, sPAP = systolic pulmonary arterial hypertension, mPAP = mean pulmonary arterial pressure, PAWP = pulmonary arterial wedge pressure, TPG = transpulmonary gradient, CO = cardiac output, PVR = pulmonary vascular resistance.
